# Supplementary material
Source: PubMed Central journal article supplement (PMC4849811)
Supplement: ASN.2014090906_ASN2014090906SupplementaryData.pdf [file ASN.2014090906_ASN2014090906SupplementaryData.pdf]

**Supplementary Table 1.** Comparisons of clinical, demographic and immunological data and indices of renal disease characteristics between total MPO-AAV patient population and subset population used for MC degranulation analysis.

|                                                                             | <b><u>Total MPO-ANCA<br/>patient population</u></b> | <b><u>Subset for MC<br/>degranulation<br/>analysis</u></b> |
|-----------------------------------------------------------------------------|-----------------------------------------------------|------------------------------------------------------------|
| <b><u>Demographic data</u></b>                                              |                                                     |                                                            |
| Patient Number                                                              | 44                                                  | 25                                                         |
| Sex (f/m)                                                                   | 14/30                                               | 9/16                                                       |
| Age <sup>1</sup> (years)                                                    | 67±2                                                | 66±3                                                       |
| <b><u>Renal involvement</u></b>                                             |                                                     |                                                            |
| Serum creatinine <sup>1</sup> (µmol/L)                                      | 395±53                                              | 355±55                                                     |
| eGFR <sup>1</sup> (mL/min/1.73m <sup>2</sup> )                              | 21.6±2.4                                            | 23.8±3.5                                                   |
| Proteinuria <sup>1,2</sup> (g/day)                                          | 1.8±0.4                                             | 1.2±4.2                                                    |
| RBC <sup>1,3</sup> (urine cells/hpf)                                        | 547±682                                             | 474±122                                                    |
| <b><u>Extra renal<br/>involvement</u></b>                                   |                                                     |                                                            |
| Lung or upper respiratory tract or skin or arthralgia presenting creatinine | 15/44                                               | 10/25                                                      |
| <b><u>Immunological<br/>data</u></b>                                        |                                                     |                                                            |
| ANCA (MPO) titer <sup>1</sup> (U/ml)                                        | 134±16                                              | 120±21                                                     |
| CRP <sup>4</sup> (mmol/L)                                                   | 70±13.9                                             | 75±0.4                                                     |

<sup>1</sup>Reported as mean ± SEM, <sup>2</sup>urinary total protein over 24 hr, <sup>3</sup>Red Blood Cell excretion, <sup>4</sup>C reactive protein on admission.

## Supplementary Figure 1

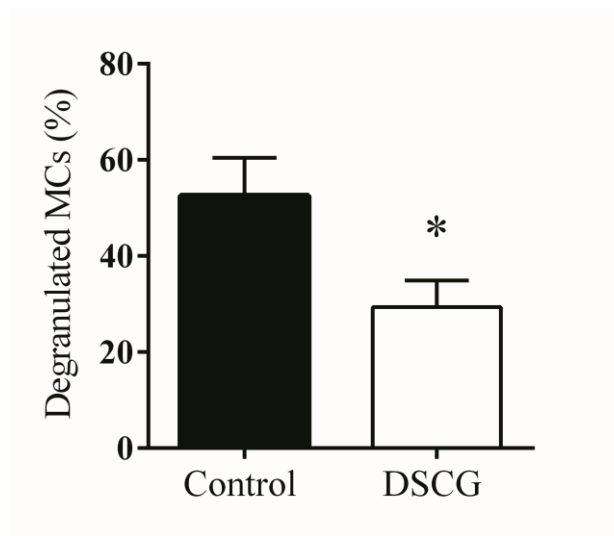

**Supplementary Figure 1:** DSCG significantly reduces MC degranulation in a model of passive cutaneous anaphylaxis. C57BL/6 mice were sensitized subcutaneously (footpad) with 10ng  $\alpha$ -DNP IgE and challenged 24hrs later with 100 $\mu$ g DNP-BSA intravenously. Two hours prior challenge (triggering MC degranulation), mice were injected intraperitoneally with either saline (control;  $n=10$ ) or DSCG ( $n=10$ ). Footpads were obtained and stained with toluidine blue to assess MC degranulation. Error bars represent mean  $\pm$  SEM with statistical analysis by Mann-Whitney  $t$ -test \* $P<0.05$ .
